# Supplementary material
Source: publisher site journal article supplement (https://www.dovepress.com/article/337647)
Supplement: Supplementary file 1 [file get_supplementary_file.php]

**Supplementary materials**

**Supplementary table 1**: Primers used for the amplification of core, NS3 and NS5A regions

| **PCR1** | | **PCR2** | |
| --- | --- | --- | --- |
| **NS3** | | | |
| 1st forward | 5’- ATCACsTGGGGrGCrGAyAC – 3’ | 2nd forward | 5’ - ACsGCrGCrTGygGGGACAT - 3’ |
| 1st reverse | 5’ - AAyTTGCCrTAkGTGGAGTAyGT – 3’ | 2nd reverse | 5’ - AAyTTGCCrTAkGTGGAGTAyGT – 3’ |
| **NS5A** | | | |
| 1st forward | 5’ - GGGCDGTRCARTGGATGAAC - 3’ | 2nd forward | 5’ - GATGAACMGGCTSATMGCSTTCG - 3’ |
| 1st reverse | 5’ - GGMTCGAADGAGTCMAGAAT - 5’ | 2nd reverse | 5’ - CCCRTCCAMTTCWGTGAARAAYTC - 3’ |
| **CORE** | | | |
| 1st forward | 5’- GGYGGYGGNCAGATCGTTGG – 3’ | 2nd forward | 5’ – GAGTWTACBTGYTGCCGCGCAG – 3’ |
| 1st reverse | 5’- ARGAAGATAGARAARGAGCAACC – 3’ | 2nd reverse | 5’ – ATRTACCCCATGAGRTCGGC – 3’ |

**Supplementary Table 2**: HCV region analyzed in serum, cancer and non-cancer tissue for each patient in Case group.

Legend: C (cancer); NC (non-cancer); S (serum)

| CASES | SAMPLES | | | GENOTYPE |
| --- | --- | --- | --- | --- |
| NS3 | NS5A | CORE |
| 29 | C- NC- S | C -NC -S | C -NC –S | 1B |
| 75 | C- NC- S | C -NC -S | C -NC -S | 1B |
| 53 | C- NC- S | C -NC -S | C -NC -S | 1B |
| 54 | C- NC- S | C -NC -S | C -NC -S | 1B |
| 8 | C- NC- S | C -NC -S | C -NC -S | 1B |
| 7 | C- NC- S | C -NC -S | C -NC -S | 1B |
| 18 | C- NC- S | C -NC -S | C -NC -S | 1B |
| 20 | C- NC- S | C -NC -S | C -NC -S | 1B |
| 105 | C- NC- S | C -NC -S | C -NC -S | 1B |
| 14 | C- NC- S | C -NC -S | C -NC -S | 1B |
| 102 | C- NC- S |  | S | 1B |
| 106 | C -NC |  |  | 1B |
| 107 | C -NC |  | C | 1B |
| 108 | C -NC |  | C- NC | 1B |
| 109 | C -NC -S |  | C- NC | 2C |
| 110 | C -NC -S |  | C | 2C |
| 111 |  |  | C- NC | 2C |

**Supplementary Table 3**: HCV region analyzed in liver tissue for each patient in Control group.

Legend: T (hepatic tissue)

| CONTROLS | SAMPLES | | | GENOTYPE |
| --- | --- | --- | --- | --- |
| NS3 | NS5A | CORE |
| 90 | T | T | T | 1B |
| 89 | T | T | T | 1B |
| 99 | T | T | T | 1B |
| 96 | T | T | T | 1B |
| 91 | T | T | T | 1B |
| 79 | T | T | T | 1B |
| 81 | T | T | T | 1B |
| 118 | T | T | T | 1B |
| 119 | T | T | T | 1B |
| 116 | T |  |  | 1B |
| 125 | T |  |  | 1B |
| 123 |  |  | T | 2 A |
| 124 |  |  | T | 2 A |
